CORRECTION

# Correction: ERP Correlates of Proactive and Reactive Cognitive Control in Treatment-Naïve Adult ADHD

Venke Arntsberg Grane, Jan Ferenc Brunner, Tor Endestad, Ida Emilia S. Aasen, Juri Kropotov, Robert Thomas Knight, Anne-Kristin Solbakk

There are values missing from the SD column in Table 1. Please see the corrected [Table 1](#) here.

**Table 1. Demographics, IQ scores on WAIS-III, and T-scores on the ASEBA Adult self-Report (ASR) DSM scales for ADHD patients (n = 33) and healthy controls (n = 31).**

|                                              | ADHD  |      | Control |      | p    |
|----------------------------------------------|-------|------|---------|------|------|
|                                              | Mean  | SD   | Mean    | SD   |      |
| Age (years)                                  | 31.3  | 9.6  | 31.9    | 10.0 | .788 |
| Education (years)                            | 10.8  | 1.6  | 11.3    | 2.2  | .057 |
| Gender (M/F)                                 | 14/19 |      | 14/17   |      | .825 |
| Work or study (number/%)                     | 19/58 |      | 31/100  |      | .001 |
| WAIS-III (IQ points)                         |       |      |         |      |      |
| FSIQ                                         | 93.7  | 13.0 | 98.9    | 10.3 | .086 |
| VCI †                                        | 93.3  | 13.6 | 95.6    | 11.3 | .470 |
| POI †                                        | 104.4 | 13.3 | 108.9   | 14.3 | .200 |
| WMI †                                        | 87.9  | 12.7 | 93.9    | 14.2 | .081 |
| PSI †                                        | 90.4  | 11.6 | 100.3   | 11.8 | .001 |
| <b>ASR DSM and Problem scales (t-scores)</b> |       |      |         |      |      |
| ADHD #                                       | 74.7  | 10.7 | 52.2    | 3.2  | .001 |
| Depression #                                 | 67.1  | 9.2  | 50.9    | 2.1  | .001 |
| Anxiety #                                    | 59.2  | 7.4  | 50.4    | 0.9  | .001 |
| Antisocial β                                 | 63.1  | 9.4  | 52.0    | 3.4  | .001 |
| Alcohol use π                                | 56.9  | 7.0  | 54.8    | 4.7  | .220 |

Notes. Education = total years of schooling completed; Work or study = working or studying during the last 6 months; FSIQ = Full Scale Intelligence Quotient; VCI = Verbal Comprehension Index; POI = Perceptual Organization Index; WMI = Working Memory Index; PSI = Processing Speed Index; Alcohol use = days being drunk during the last 6 months;

† = missing data in 1 ADHD patient;

# = missing data in 1 ADHD patient and 1 control;

β = missing data in 5 ADHD patients and 5 controls;

π = missing data in 8 ADHD patients and 7 controls.

doi:10.1371/journal.pone.0163404.t001

## Reference

1. Grane VA, Brunner JF, Endestad T, Aasen IES, Kropotov J, Knight RT, et al. (2016) ERP Correlates of Proactive and Reactive Cognitive Control in Treatment-Naïve Adult ADHD. PLoS ONE 11(7): e0159833. doi: [10.1371/journal.pone.0159833](https://doi.org/10.1371/journal.pone.0159833) PMID: [27448275](https://pubmed.ncbi.nlm.nih.gov/27448275/)

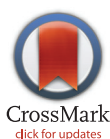

## OPEN ACCESS

**Citation:** Grane VA, Brunner JF, Endestad T, Aasen IES, Kropotov J, Knight RT, et al. (2016) Correction: ERP Correlates of Proactive and Reactive Cognitive Control in Treatment-Naïve Adult ADHD. PLoS ONE 11(9): e0163404. doi:10.1371/journal.pone.0163404

**Published:** September 15, 2016

**Copyright:** © 2016 Grane et al. This is an open access article distributed under the terms of the [Creative Commons Attribution License](https://creativecommons.org/licenses/by/4.0/), which permits unrestricted use, distribution, and reproduction in any medium, provided the original author and source are credited.
